# Supplementary material
Source: PubMed Central journal article supplement (PMC8022930)
Supplement: glycobiology_suppmat_cwaa070.pdf [file glycobiology_suppmat_cwaa070.pdf]

**Supplemental 1: HMM search results against all HMMs for glycoside hydrolase families. The catalytic residues are in red.**

Query: Sequence [L=1545]

Scores for complete sequence (score includes all domains):

| --- full sequence --- |       |      | --- best 1 domain --- |       |      | -#dom- |   |                      |             |  |
|-----------------------|-------|------|-----------------------|-------|------|--------|---|----------------------|-------------|--|
| E-value               | score | bias | E-value               | score | bias | exp    | N | Model                | Description |  |
| 2.6e-05               | 19.0  | 0.2  | 4.6e-05               | 18.2  | 0.2  | 1.3    | 1 | <a href="#">GH39</a> |             |  |
| 0.00061               | 13.8  | 0.0  | 0.0012                | 12.9  | 0.0  | 1.4    | 1 | <a href="#">GH79</a> |             |  |

Domain annotation for each model (and alignments):

[top](#) >> GH39

| #   | score | bias | c-Evalue | i-Evalue | hmmfrom | hmm to | alifrom | ali to | envfrom | env to | acc  |
|-----|-------|------|----------|----------|---------|--------|---------|--------|---------|--------|------|
| 1 ! | 18.2  | 0.2  | 1.9e-07  | 4.6e-05  | 149     | 338 .. | 185     | 320 .. | 166     | 329 .. | 0.79 |

Alignments for each domain:

== domain 1 score: 18.2 bits; conditional E-value: 1.9e-07

```
GH39_allsf 149 nggeeVrawvfEiWNEPNltFagfWnsdlswgrgappgdpagYfeLlkatyraIKavdP.....nakVgGPalapagpsdldwlrFLlfckngvpp 241
n+ +++++ E+ NEPNl +++ g+ + d Y +++++ + a+K v+ +kVgGP l++ ++ + ++F +++++ +
Sequence 185 NP--KIEYI--EVGNEPNLE-PAYY-----GHVKDDIPGYMRMYQGMSEAVKWNNAqglagqPLKVGGPVLSG---YNFEKQKQFVDLAYAASYQV 267
55..89999..*****6.5566.....46677777*****9988777779*****888...***** PP
```

```
GH39_allsf 242 DfvswHpYgsgnppedefgyttlprpdpadgwlrlphprfyfrredvaalrallaayGlpprpPiwiEyGwstspgtpgyvaarlpedepgvdpegg 338
DfvswH Y + + +++++ + +++++ +++++ l+++ p + ++EyGw +++++ + p++
Sequence 268 DFVSWHRYQED-----VRMNETQ-----EIEMKSYLHKF-YPNAI-TIVSEYGW--K-----GGGLSDPTN 320
*****988.....5555552.....356666666666.54455.77888888..6.....6666666665 PP
```

[top](#) >> GH79

| #   | score | bias | c-Evalue | i-Evalue | hmmfrom | hmm to | alifrom | ali to | envfrom | env to | acc  |
|-----|-------|------|----------|----------|---------|--------|---------|--------|---------|--------|------|
| 1 ! | 12.9  | 0.0  | 4.9e-06  | 0.0012   | 141     | 280 .. | 184     | 276 .. | 170     | 279 .. | 0.72 |

Alignments for each domain:

== domain 1 score: 12.9 bits; conditional E-value: 4.9e-06

```
GH79_allsf 141 aaGdnLdafElGNEPDLYatsrHghrprgpanw.tpsdYvaewgslataiseaaqleaaaadgnlsgkalligPsGffagsahttnsstvgggWppv 238
+ +++ ++E+GNEP+L pa + ++d+++ + + + +s ++ + ++++++ ++ + +gP + g
Sequence 184 K-NPKIEYIEVGNEPNLE-----PAYYgHVKDDIPGYMRMYQGMS---EAVKWNNAQGLAGQPL-KVGGPV---LS-----GY--- 248
4.46799*****54.....5567855555555555555555...4555*****999999.988888...55.....67... PP
```

```
GH79_allsf 239 tgtpedllntadtirlGsalildlglsgyggss.lktisvHhYP 280
+ +e + + +d l+y+ s+ ++ +s+H+Y+
```

```
Sequence 249 N--FEKQKQ-----FVD--LAYAASYqVDFVSWHRYQ 276
8..877777.....777..57887778*****6 PP
```

**Supplemental 2: Blast analysis to see the extent of the new family (GHxxx).** Until proof of activity has been found for the more remote members, it is safer to restrict family membership to those sequences in the red box. In the meantime, sequences outside of the red box will be placed in the non-classified section of CAZy. We will reexamine the possible membership of these sequences to family GHxxx when family GHxxx has sufficient diversity (too few members right now)

Sequences producing significant alignments:

Select: [All](#) [None](#) Selected:0

| Alignments                                                            |                                                                                     |           |             |             |         |            |                                |
|-----------------------------------------------------------------------|-------------------------------------------------------------------------------------|-----------|-------------|-------------|---------|------------|--------------------------------|
| Download GenPept Graphics Distance tree of results Multiple alignment |                                                                                     |           |             |             |         |            |                                |
|                                                                       | Description                                                                         | Max Score | Total Score | Query Cover | E value | Per. Ident | Accession                      |
| <input type="checkbox"/>                                              | <a href="#">DUF5011 domain-containing protein [Paenibacillus sp. 32352]</a>         | 806       | 806         | 100%        | 0.0     | 100.00%    | <a href="#">WP_079915027.1</a> |
| <input type="checkbox"/>                                              | <a href="#">discoidin domain-containing protein [Paenibacillus sp. URHA0014]</a>    | 728       | 728         | 100%        | 0.0     | 88.95%     | <a href="#">WP_028553222.1</a> |
| <input type="checkbox"/>                                              | <a href="#">discoidin domain-containing protein [Paenibacillus whitsoniae]</a>      | 727       | 727         | 100%        | 0.0     | 88.68%     | <a href="#">WP_126144750.1</a> |
| <input type="checkbox"/>                                              | <a href="#">discoidin domain-containing protein [Paenibacillus sp. Soil766]</a>     | 726       | 726         | 100%        | 0.0     | 88.68%     | <a href="#">WP_057315858.1</a> |
| <input type="checkbox"/>                                              | <a href="#">discoidin domain-containing protein [Paenibacillus sp. Soil750]</a>     | 724       | 724         | 99%         | 0.0     | 88.65%     | <a href="#">WP_056617367.1</a> |
| <input type="checkbox"/>                                              | <a href="#">discoidin domain-containing protein [Paenibacillus oryzisoli]</a>       | 722       | 722         | 100%        | 0.0     | 88.16%     | <a href="#">WP_068663733.1</a> |
| <input type="checkbox"/>                                              | <a href="#">hypothetical protein BK126_18045 [Paenibacillus sp. FSL H7-0326]</a>    | 583       | 583         | 100%        | 0.0     | 71.65%     | <a href="#">OMC67485.1</a>     |
| <input type="checkbox"/>                                              | <a href="#">discoidin domain-containing protein [Paenibacillus sp. FSL H7-0326]</a> | 583       | 583         | 100%        | 0.0     | 71.65%     | <a href="#">WP_083655951.1</a> |
| <input type="checkbox"/>                                              | <a href="#">DUF5011 domain-containing protein [Paenibacillus sp. YN15]</a>          | 582       | 582         | 98%         | 0.0     | 73.70%     | <a href="#">WP_113018908.1</a> |
| <input type="checkbox"/>                                              | <a href="#">DUF5011 domain-containing protein [Paenibacillus sp. YN15]</a>          | 224       | 224         | 90%         | 2e-61   | 38.27%     | <a href="#">WP_113018909.1</a> |
| <input type="checkbox"/>                                              | <a href="#">discoidin domain-containing protein [Vallitalea quaymasensis]</a>       | 121       | 121         | 94%         | 5e-26   | 27.30%     | <a href="#">WP_113675418.1</a> |
| <input type="checkbox"/>                                              | <a href="#">hypothetical protein [Streptomyces griseus]</a>                         | 74.7      | 74.7        | 85%         | 1e-10   | 25.62%     | <a href="#">WP_037672359.1</a> |
| <input type="checkbox"/>                                              | <a href="#">hypothetical protein [Micromonospora echinospora]</a>                   | 73.6      | 73.6        | 48%         | 3e-10   | 30.41%     | <a href="#">WP_145834095.1</a> |
| <input type="checkbox"/>                                              | <a href="#">hypothetical protein [Paenibacillus aceris]</a>                         | 73.6      | 73.6        | 82%         | 4e-10   | 25.66%     | <a href="#">NHW38917.1</a>     |
| <input type="checkbox"/>                                              | <a href="#">hypothetical protein [Micromonospora echinospora]</a>                   | 72.8      | 72.8        | 48%         | 5e-10   | 30.41%     | <a href="#">WP_088980648.1</a> |
| <input type="checkbox"/>                                              | <a href="#">hypothetical protein C6376_36625 [Streptomyces sp. P3]</a>              | 72.8      | 72.8        | 85%         | 6e-10   | 25.62%     | <a href="#">AVV46075.1</a>     |
| <input type="checkbox"/>                                              | <a href="#">hypothetical protein [Streptomyces sp. P3]</a>                          | 72.4      | 72.4        | 85%         | 6e-10   | 25.62%     | <a href="#">WP_159083366.1</a> |
| <input type="checkbox"/>                                              | <a href="#">hypothetical protein [Streptomyces sp. SLBN-192]</a>                    | 70.5      | 70.5        | 82%         | 3e-09   | 25.35%     | <a href="#">WP_142165674.1</a> |
| <input type="checkbox"/>                                              | <a href="#">hypothetical protein GA0074692_4185 [Micromonospora pallida]</a>        | 70.1      | 70.1        | 48%         | 4e-09   | 29.35%     | <a href="#">SCL35799.1</a>     |
| <input type="checkbox"/>                                              | <a href="#">carbohydrate-binding protein [Paenibacillus sp. YN15]</a>               | 65.9      | 65.9        | 50%         | 1e-07   | 28.83%     | <a href="#">WP_113018907.1</a> |
| <input type="checkbox"/>                                              | <a href="#">hypothetical protein ACM01_07090 [Streptomyces viridochromogenes]</a>   | 64.7      | 64.7        | 82%         | 2e-07   | 23.71%     | <a href="#">KMS75983.1</a>     |
| <input type="checkbox"/>                                              | <a href="#">hypothetical protein [Streptomyces viridochromogenes]</a>               | 64.7      | 64.7        | 82%         | 2e-07   | 23.71%     | <a href="#">WP_159029107.1</a> |
| <input type="checkbox"/>                                              | <a href="#">hypothetical protein [Nocardioides sp. SLBN-172]</a>                    | 64.3      | 64.3        | 84%         | 3e-07   | 22.75%     | <a href="#">WP_141790907.1</a> |
